# Supplementary material for: Coordination features of ditopic oxa-azamacrocycles toward Ni(ii) and Co(ii). Dioxygen uptake by their dinuclear Co(ii) complexes
Source: Royal Society of Chemistry journal article supplement (doi:10.1039/b312751f), 2004-01-01
Supplement: b312751f.pdf [file b312751f.pdf]

## Supplementary information

**Table S1.** Stability constants of the mononuclear Ni(II) and Co(II) complexes (log K) with L1, L2, and L3 (0.15 NaCl, 298.1 K) in anaerobic conditions.

| Reaction                                    | Log K                  |          |          |
|---------------------------------------------|------------------------|----------|----------|
|                                             | L1 <sup>(a)</sup>      | L2       | L3       |
| Ni + L = NiL <sup>(b)</sup>                 | 9.94(4) <sup>(c)</sup> | 11.7(1)  | 12.38(9) |
| NiL + H = NiHL                              | 8.13(8)                | 9.2(1)   | 8.9(1)   |
| NiHL + H = NiH <sub>2</sub> L               | 7.52(7)                | 8.1(1)   | 7.77(9)  |
| NiH <sub>2</sub> L + H = NiH <sub>3</sub> L |                        |          | 5.75(8)  |
| NiL + OH = NiL(OH)                          | 2.9(1)                 |          | 2.8(1)   |
| Co + L = CoL                                | 7.12(4)                | 9.3(1)   | 8.40(3)  |
| CoL + H = CoHL                              | 8.67(7)                | 8.7(1)   | 9.21(4)  |
| CoHL + H = CoH <sub>2</sub> L               | 7.61(6)                | 7.6(1)   | 8.26(4)  |
| CoH <sub>2</sub> L + H = CoH <sub>3</sub> L | 6.3(1)                 |          |          |
| CoL + OH = CoL(OH)                          |                        | 4.5(1)   |          |
| Co + L + 2H = CoH <sub>2</sub> L            | 23.40(7)               | 25.87(1) | 25.94(3) |

<sup>(a)</sup> Taken from ref. 27b

<sup>(b)</sup> Charged omitted for clarity

<sup>(c)</sup> Value in parentheses are standard deviation in the last significant figure.

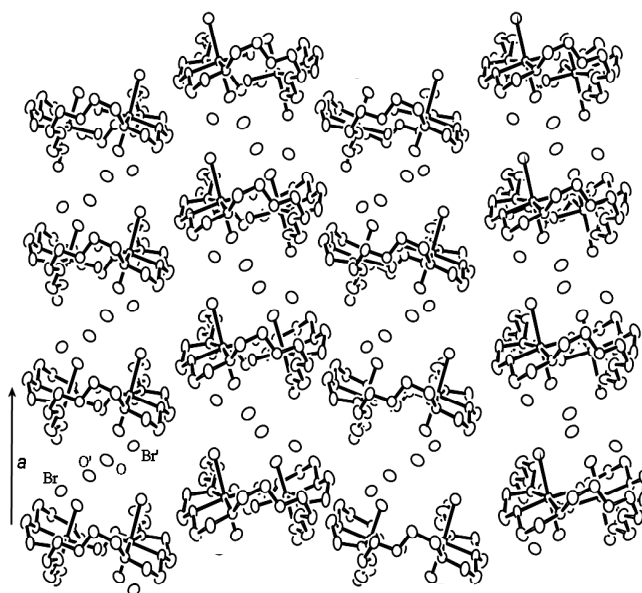

**Figure S1.** Crystal packing of  $[\text{Ni}_2\text{L1Br}_2(\text{H}_2\text{O})_4]\text{Br}_2 \cdot 2\text{H}_2\text{O}$  showing the pillars growing along the  $a$  axis. The labelled Br, Br', O and O' atoms are symmetry related by an inversion centre.
